# Supplementary material for: Enhanced NSAIDs Solubility in Drug–Drug Formulations with Ciprofloxacin
Source: MDPI journal article supplement (doi:10.3390/ijms24043305), 2023-02-07
Supplement: s1 [file s1]

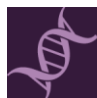

Article

# Enhanced NSAIDs solubility in drug-drug formulations with ciprofloxacin

Francisco Javier Acebedo-Martínez <sup>1</sup>, Alicia Domínguez-Martín <sup>2</sup>, Carolina Alarcón-Payer <sup>3</sup>, Alejandro Sevillano-Páez <sup>1,2</sup>, Cristóbal Verdugo-Escamilla <sup>1</sup>, Josefa María González-Pérez <sup>2</sup>, Fernando Martínez-Checa <sup>4,5,\*</sup>, Duane Choquesillo-Lazarte <sup>1,\*</sup>

## Table of contents

Figure S1. PXRD patterns of the molecular salts obtained by LAG, compared with their respective components.

Figure S2. PXRD patterns of the salt hydrate CIP—MEF·H<sub>2</sub>O obtained by liquid-assisted grinding (LAG), the simulated pattern from crystal structure and the related salt CIP—MEF.

Figure S3. ORTEP representation showing the asymmetric unit of CIP—MEF (left), CIP—MEF·H<sub>2</sub>O (center) and CIP—TLF (right) with atom numbering scheme (thermal ellipsoids are plotted with the 50% probability level).

Figure S4. ORTEP representation showing the asymmetric unit of CIP—SLD (left) and CIP—DIC (right) with atom numbering scheme (thermal ellipsoids are plotted with the 50% probability level).

Figure S5. ORTEP representation showing the asymmetric unit of CIP—KET (left) and CIP—DKT (right) with atom numbering scheme (thermal ellipsoids are plotted with the 50% probability level).

Figure S6. Tetrameric supramolecular unit in the crystal structures of CIP—MEF (left), CIP—MEF·H<sub>2</sub>O (center) and CIP—TLF (right).

Figure S7. Tetrameric supramolecular unit in the crystal structures of CIP—DIC (top left), CIP—KET (top right) and CIP—DKT (bottom).

Figure S8. DSC and TG traces of the reported molecular salts.

Figure S9. PXRD patterns of the reported molecular salts after aqueous slurring for 24 hours.

Figure S10. TG analysis of the hydrate salt CIP—MEF·H<sub>2</sub>O.

Figure S11. PXRD patterns of reported molecular salts under accelerated ageing conditions for 2 months.

Figure S12. Chromatogram of CIP—DKT salt showing a first peak corresponding to CIP and a second peak corresponding to DKT.

Figure S13. Calibration curve of CIP determined from HPLC data.

Figure S14 Antimicrobial activity of CIP and CIP phases on TSA agar plates cultured with *Staphylococcus aureus* (ATCC 9144, first row) and *Escherichia coli* (CECT 101, second row).

Table S1. Crystallographic data and structure refinement details of CIP—NSAIDs molecular salts.

Table S2. Hydrogen bonds for CIP—NSAIDs molecular salts [Å and deg.].

Table S3. HPLC method parameters.

Experimental procedure for determination of solubility by HPLC analysis.

Table S4. Zone of inhibition values of CIP and the reported molecular salts.

Table S5. Contribution of CIP in each CIP—NSAID molecular salt.

Table S6. Final pH values measured during solubility determination by HPLC analysis.

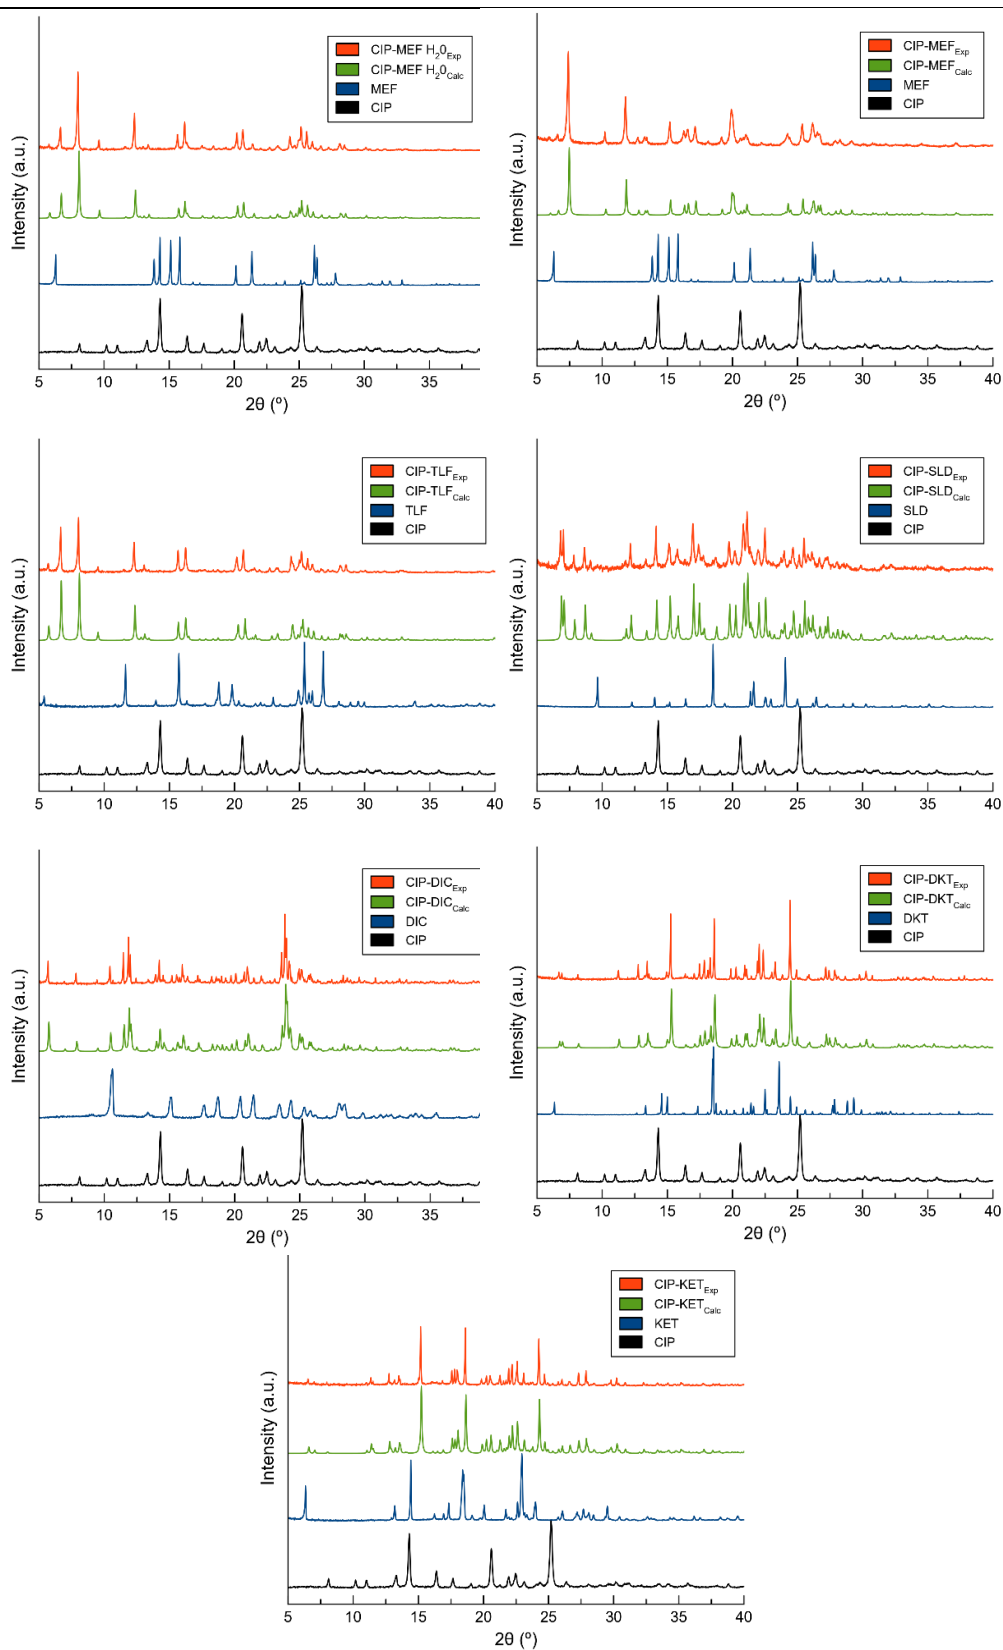

Figure S1. PXRD patterns of the molecular salts obtained by LAG, compared with their respective components.

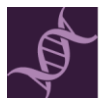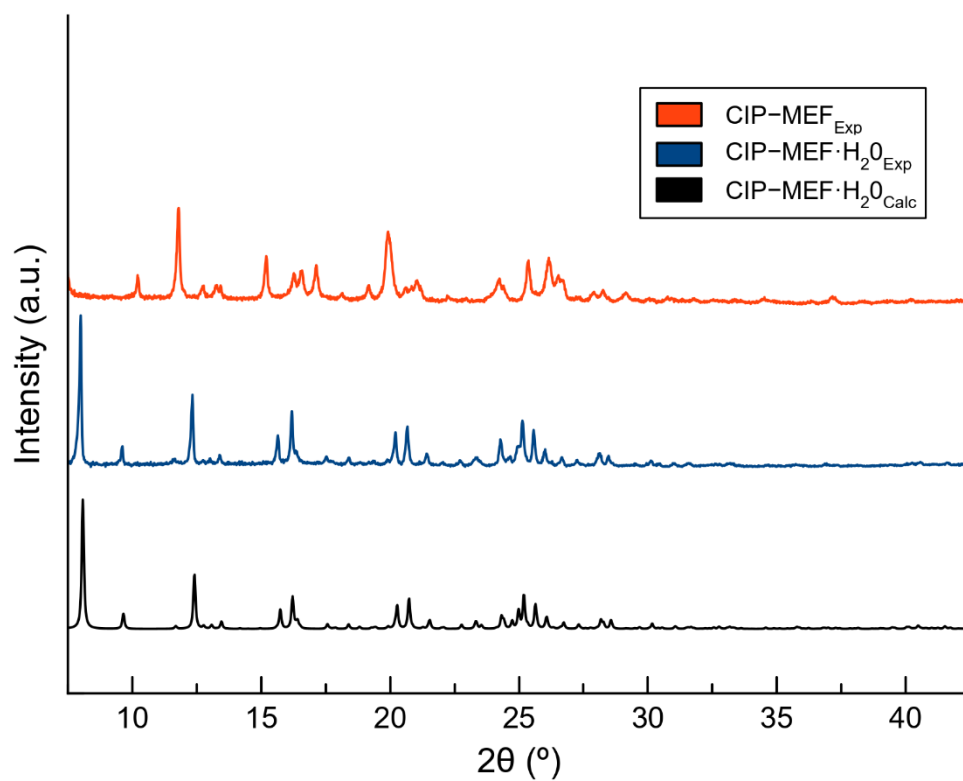

Figure S2. PXRD patterns of the salt hydrate CIP-MEF·H<sub>2</sub>O obtained by liquid-assisted grinding (LAG), the simulated pattern from crystal structure and the related salt CIP-MEF.

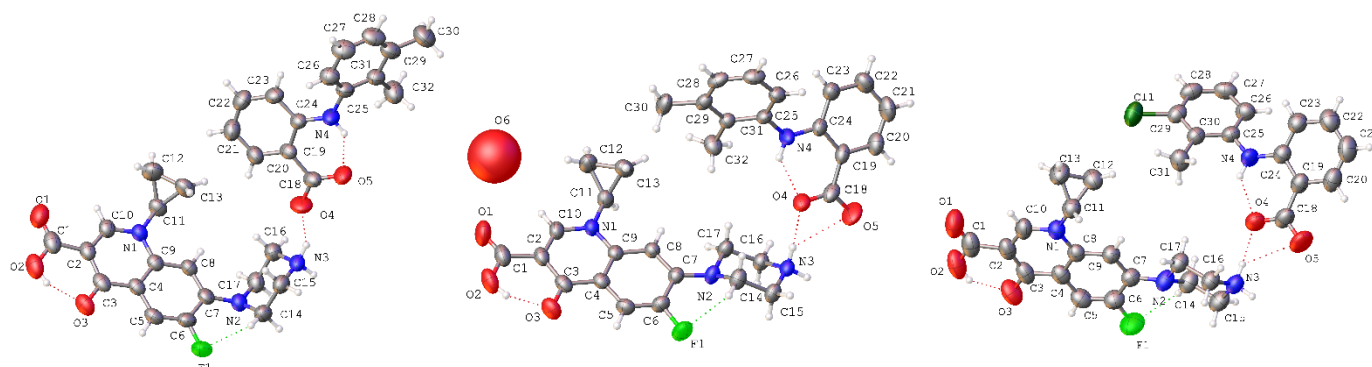

Figure S3. ORTEP representation showing the asymmetric unit of CIP—MEF (left), CIP—MEF·H<sub>2</sub>O (center) and CIP—TLF (right) with atom numbering scheme (thermal ellipsoids are plotted with the 50% probability level).

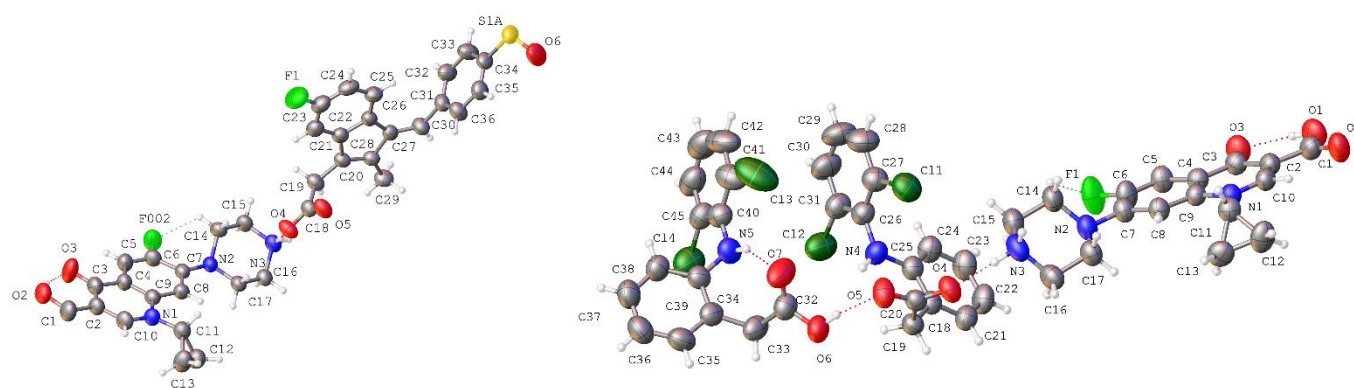

Figure S4. ORTEP representation showing the asymmetric unit of CIP—SLD (left) and CIP—DIC (right) with atom numbering scheme (thermal ellipsoids are plotted with the 50% probability level).

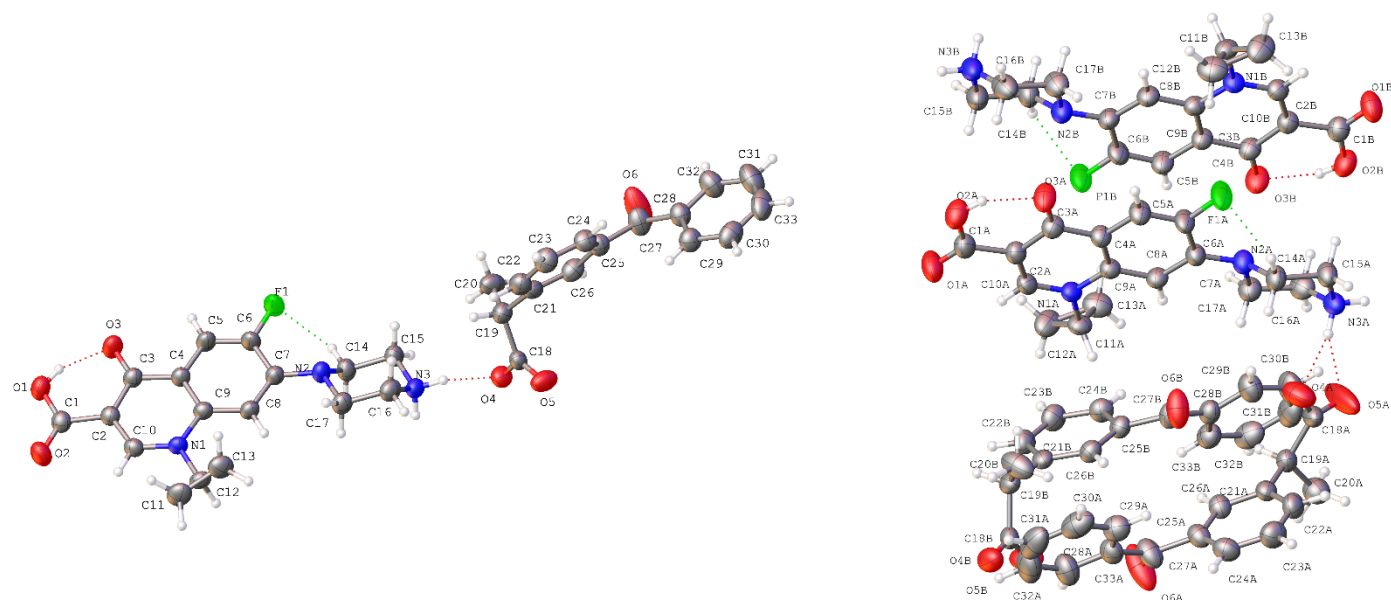

Figure S5. ORTEP representation showing the asymmetric unit of CIP—KET (left) and CIP—DKT (right) with atom numbering scheme (thermal ellipsoids are plotted with the 50% probability level).

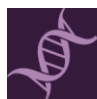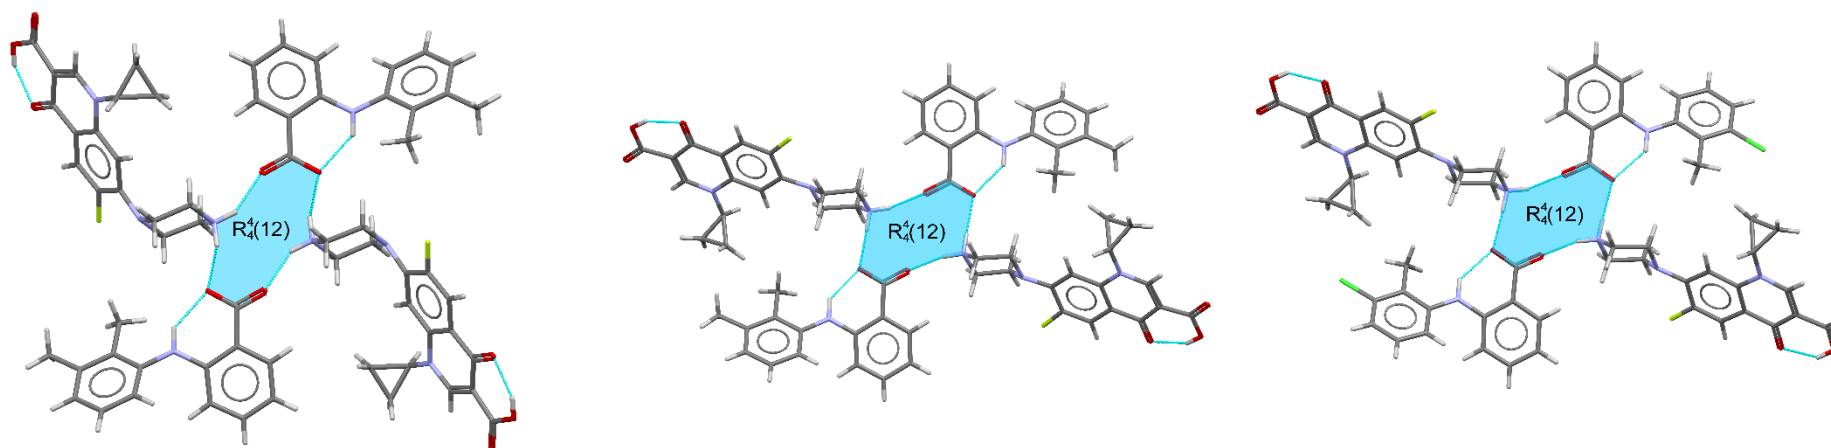

Figure S6. Tetrameric supramolecular unit in the crystal structures of CIP—MEF (left), CIP—MEF·H<sub>2</sub>O (center) and CIP—TLF (right).

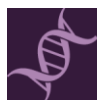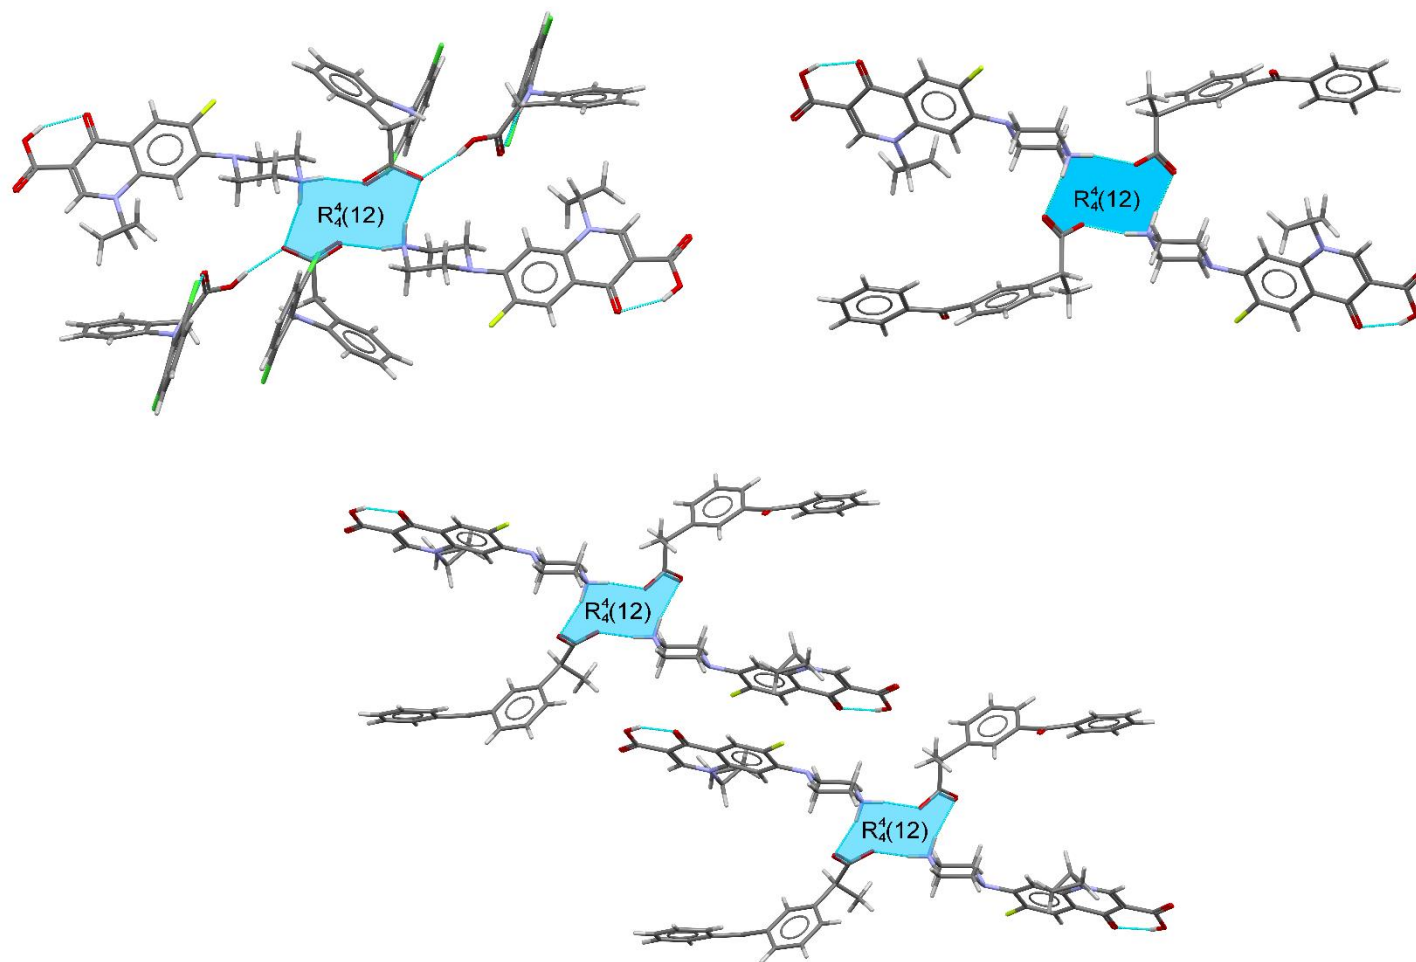

Figure S7. Tetrameric supramolecular unit in the crystal structures of CIP—DIC (top left), CIP—KET (top right) and CIP—DKT (bottom).

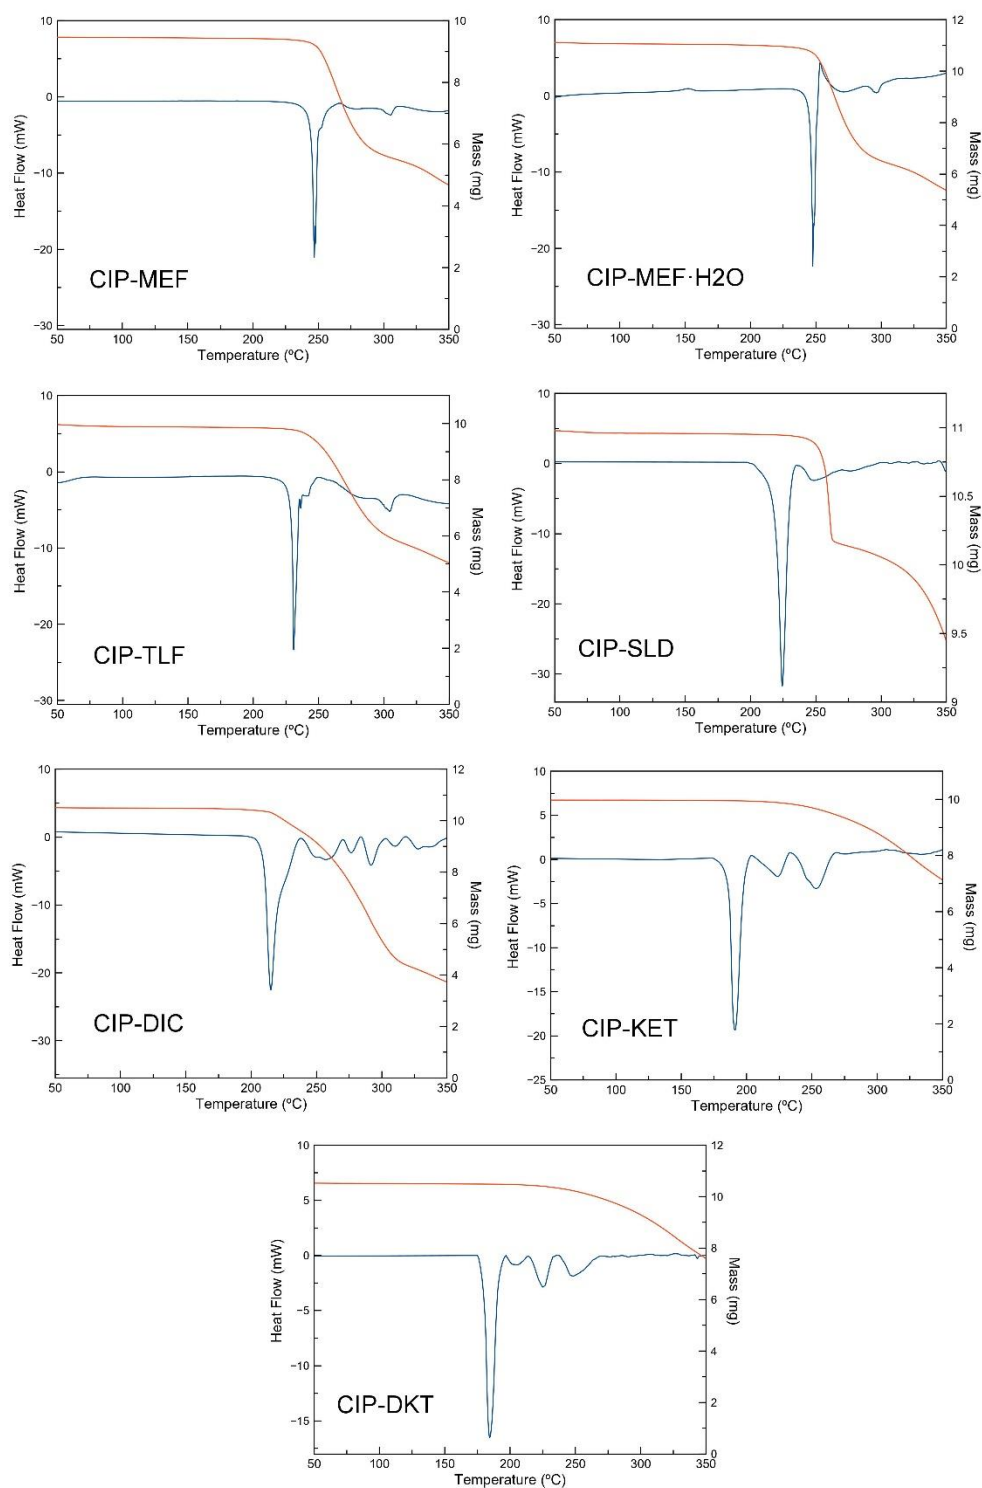

Figure S8. DSC and TG traces of the reported molecular salts.



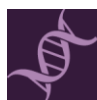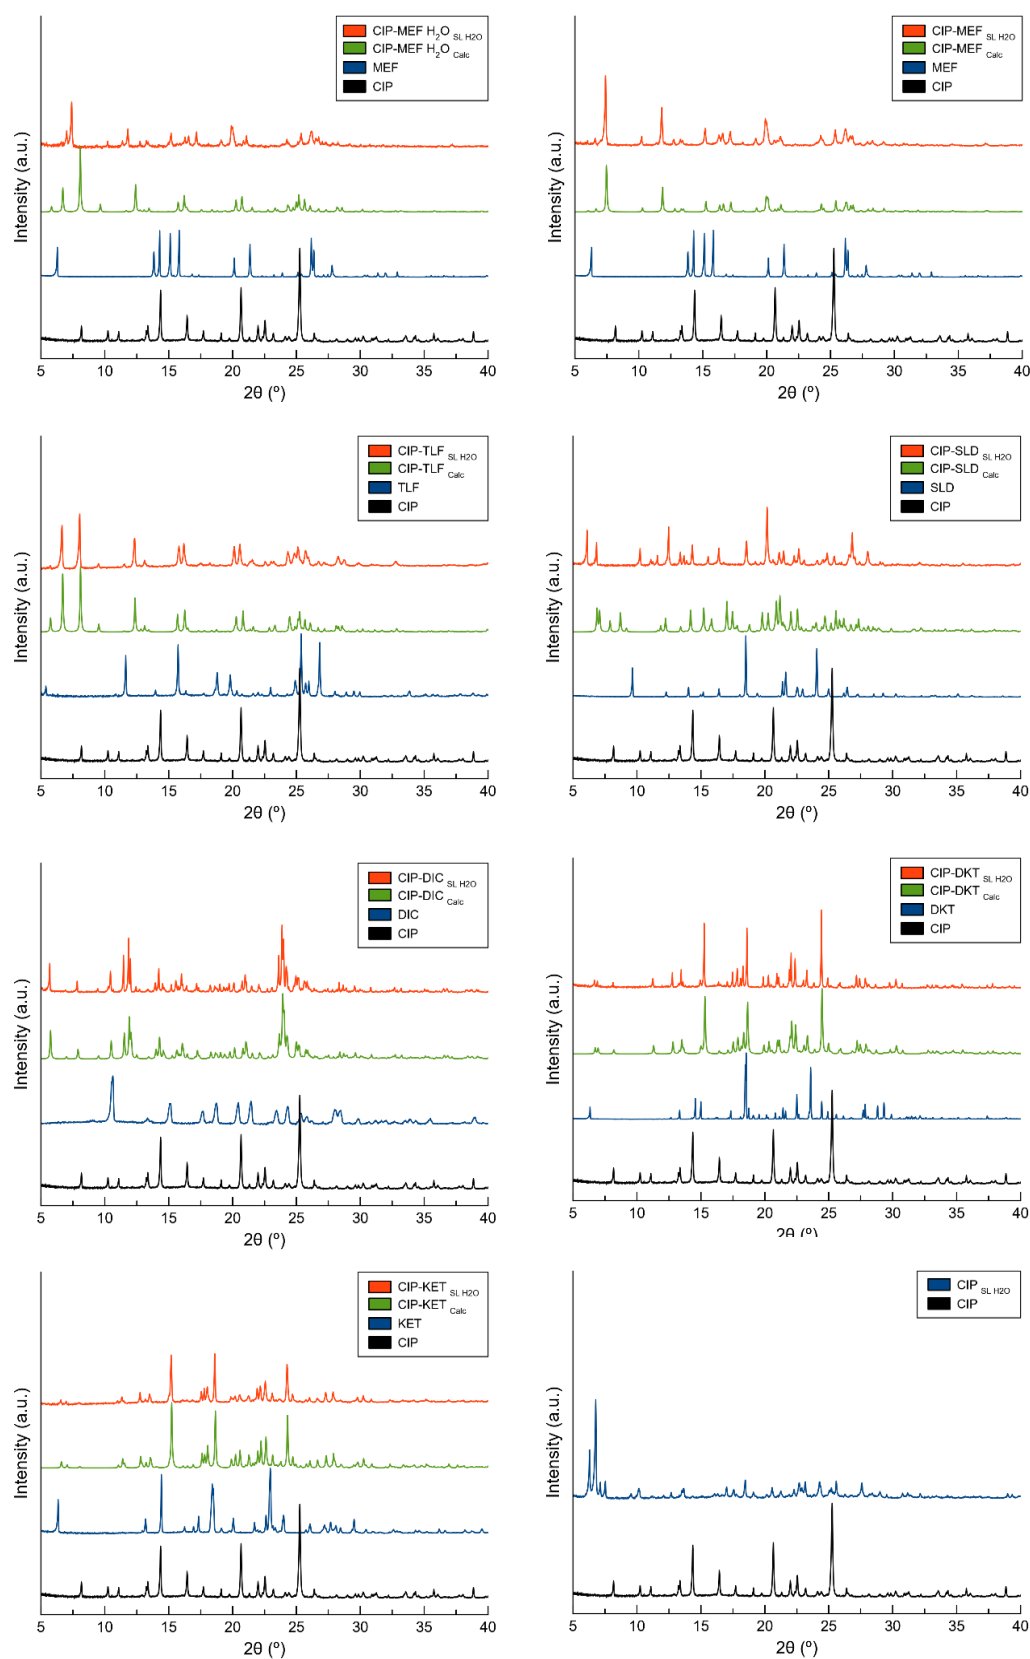

Figure S9. PXRD patterns of the reported molecular salts after aqueous slurring for 24 hours.

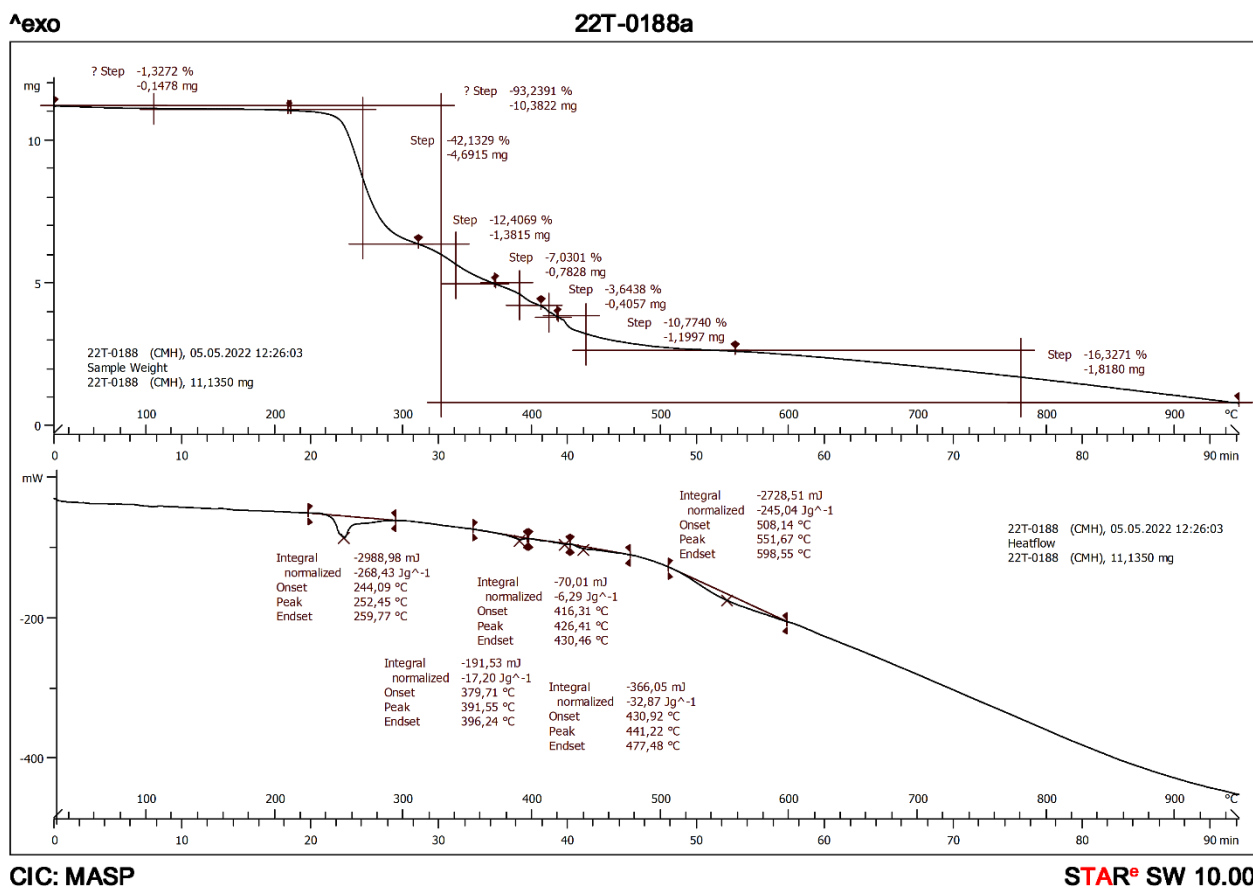

Figure S10. TG analysis of the hydrate salt CIP—MEF·H<sub>2</sub>O.

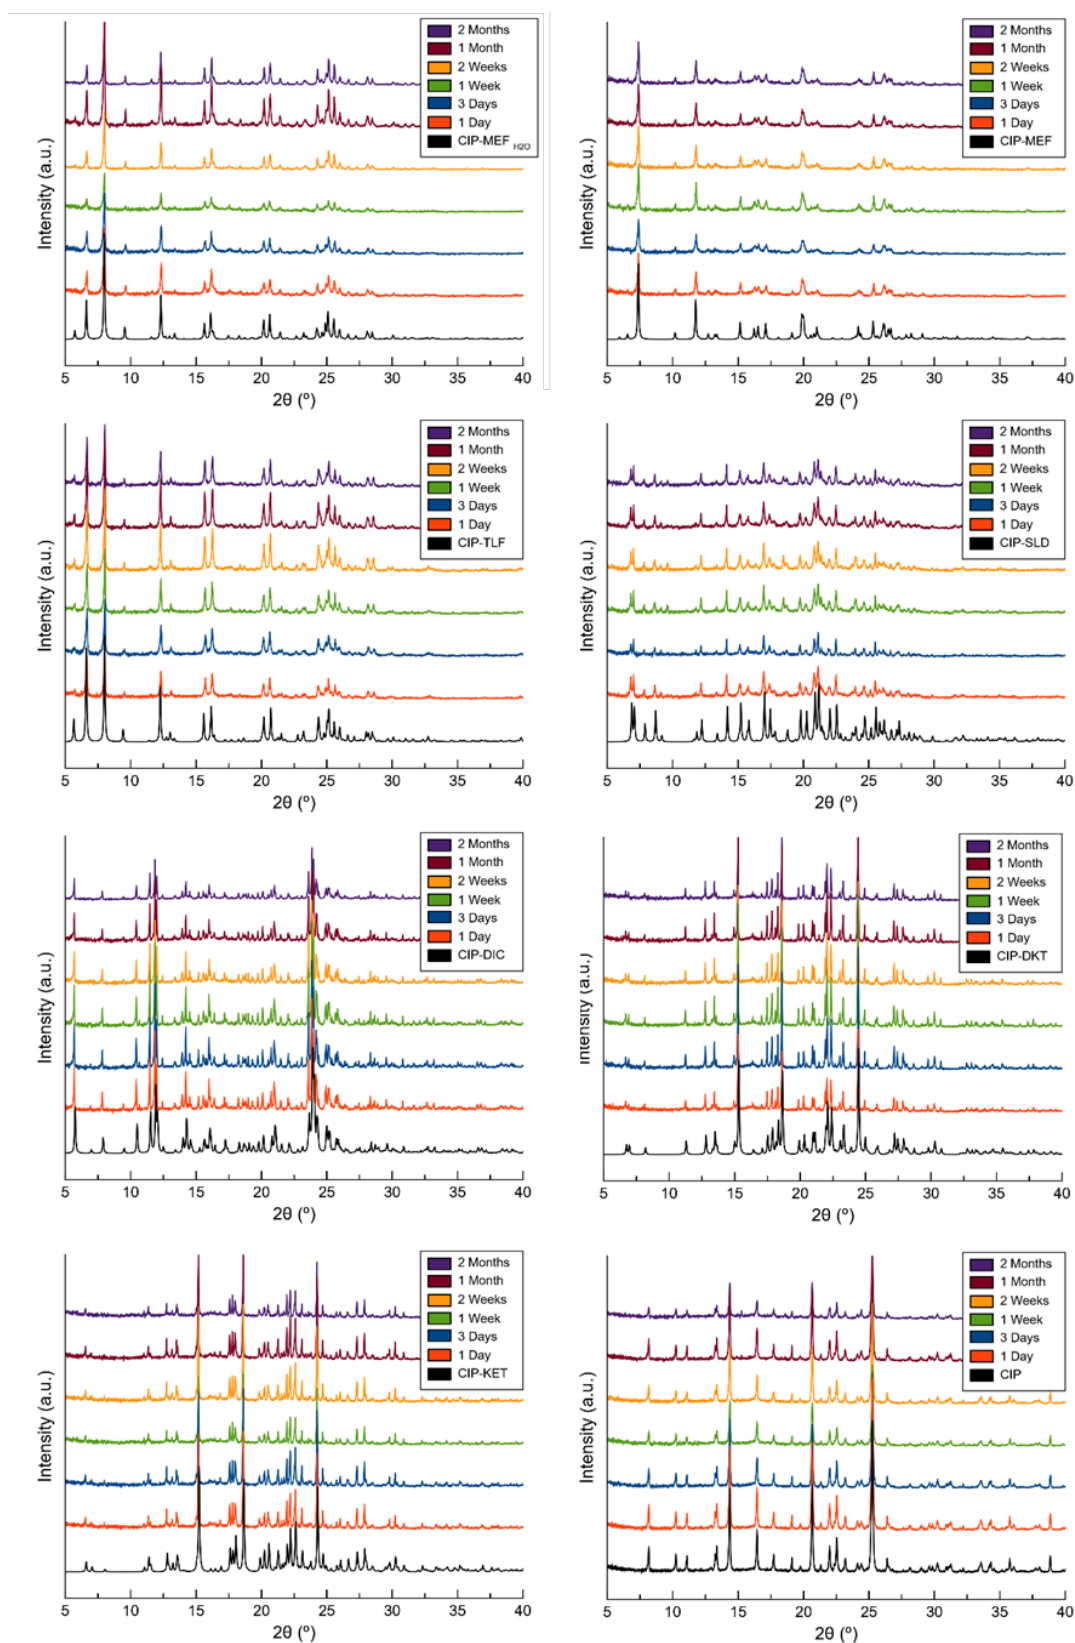

Figure S11. PXRD patterns of reported molecular salts under accelerated ageing conditions for 2 months.

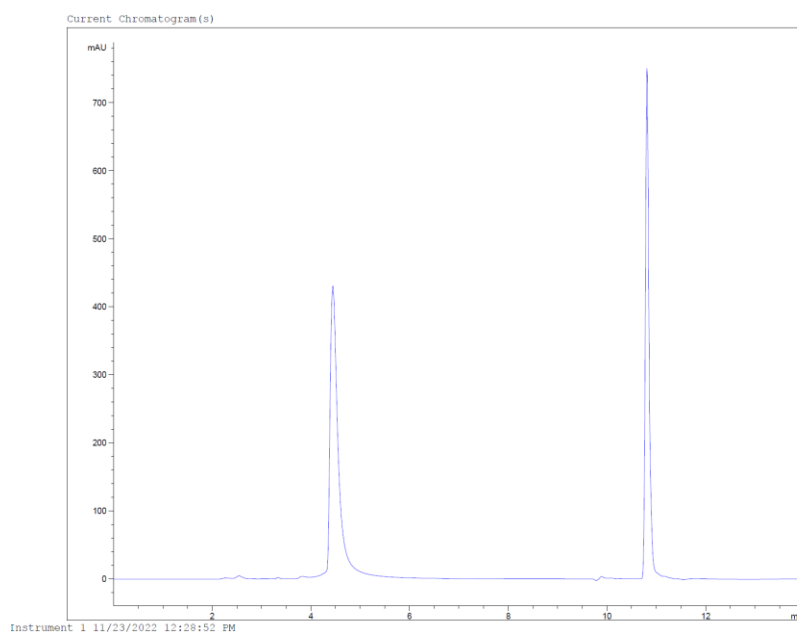

Figure S12. Chromatogram of CIP—DKT salt showing a first peak corresponding to CIP and a second peak corresponding to DKT.

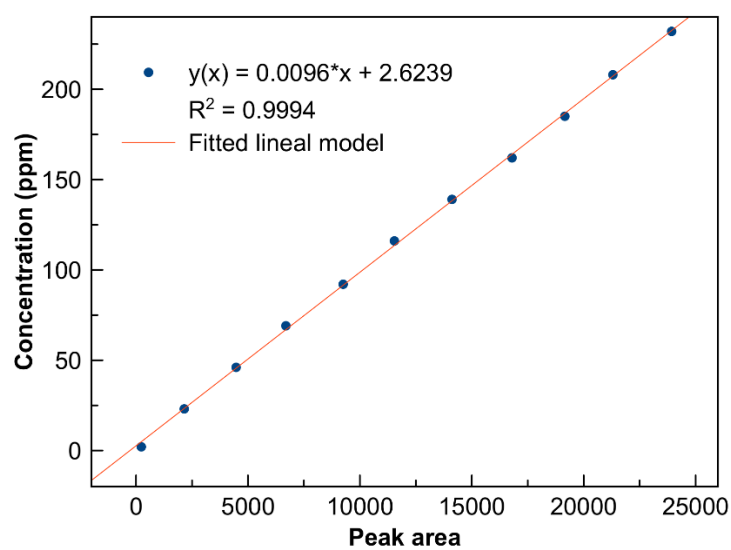

Figure S13. Calibration curve of CIP determined from HPLC data.

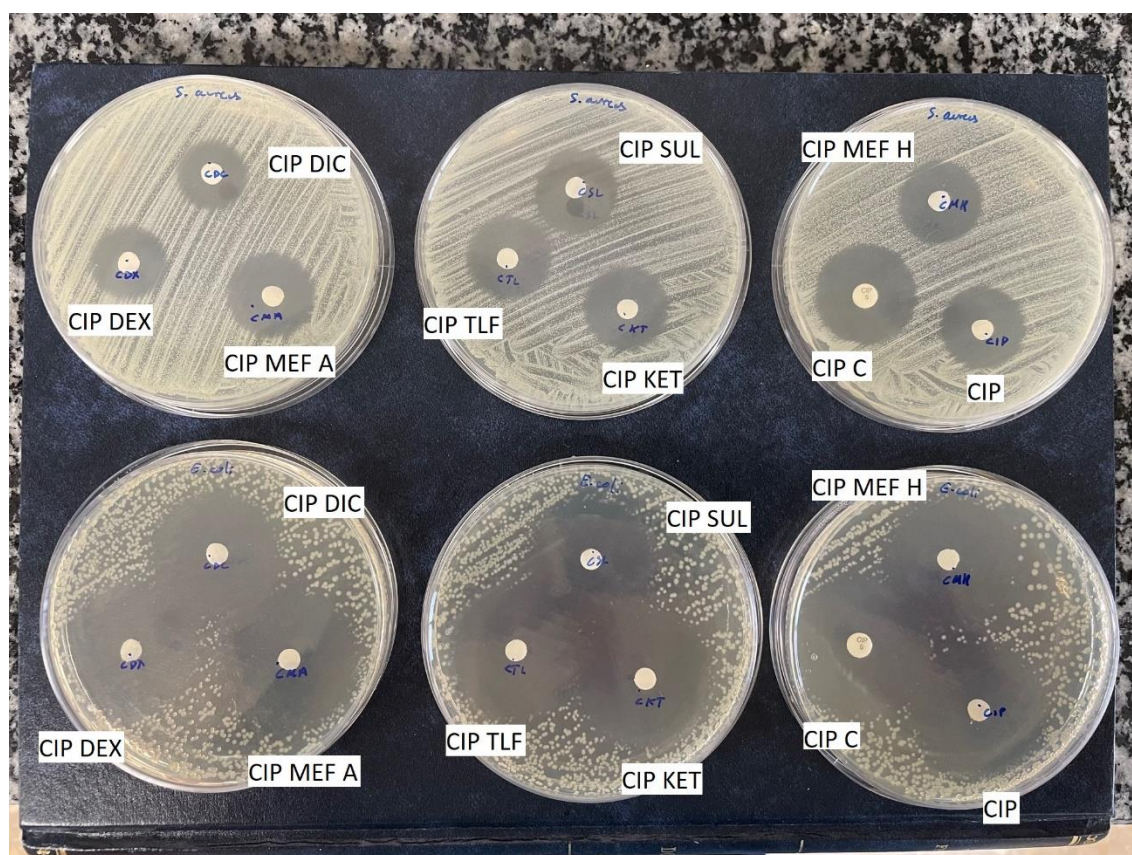

Figure S14. Antimicrobial activity of CIP and CIP phases on TSA agar plates cultured with *Staphylococcus aureus* (ATCC 9144, first row) and *Escherichia coli* (CECT 101, second row).



Table S1. Crystallographic data and structure refinement details of CIP-NSAIDs molecular salts.

| Compound name                     | CIP-MEF                                                        | CIP-MEF·H <sub>2</sub> O                                       | CIP-TLF                                                          | CIP-SLD                                                                        | CIP-DIC                                                                        | CIP-KET                                                        | CIP-DKT                                                        |
|-----------------------------------|----------------------------------------------------------------|----------------------------------------------------------------|------------------------------------------------------------------|--------------------------------------------------------------------------------|--------------------------------------------------------------------------------|----------------------------------------------------------------|----------------------------------------------------------------|
| Formula                           | C <sub>32</sub> H <sub>33</sub> FN <sub>4</sub> O <sub>5</sub> | C <sub>32</sub> H <sub>35</sub> FN <sub>4</sub> O <sub>6</sub> | C <sub>31</sub> H <sub>30</sub> ClFN <sub>4</sub> O <sub>5</sub> | C <sub>37</sub> H <sub>35</sub> F <sub>2</sub> N <sub>3</sub> O <sub>6</sub> S | C <sub>45</sub> H <sub>40</sub> Cl <sub>4</sub> FN <sub>5</sub> O <sub>7</sub> | C <sub>33</sub> H <sub>32</sub> FN <sub>3</sub> O <sub>6</sub> | C <sub>33</sub> H <sub>32</sub> FN <sub>3</sub> O <sub>6</sub> |
| Formula weight                    | 572.62                                                         | 590.64                                                         | 593.04                                                           | 687.74                                                                         | 923.62                                                                         | 585.61                                                         | 585.61                                                         |
| Crystal system                    | Triclinic                                                      | Triclinic                                                      | Triclinic                                                        | Monoclinic                                                                     | Triclinic                                                                      | Triclinic                                                      | Triclinic                                                      |
| Space group                       | P-1                                                            | P-1                                                            | P-1                                                              | P2 <sub>1</sub> /n                                                             | P-1                                                                            | P-1                                                            | P1                                                             |
| a/Å                               | 7.0100(3)                                                      | 7.35750(10)                                                    | 7.3321(12)                                                       | 13.2001(12)                                                                    | 7.6759(4)                                                                      | 8.1012(8)                                                      | 8.2206(2)                                                      |
| b/Å                               | 14.2507(6)                                                     | 13.7396(2)                                                     | 13.685(3)                                                        | 5.5503(5)                                                                      | 15.7770(8)                                                                     | 13.7214(11)                                                    | 13.6705(4)                                                     |
| c/Å                               | 15.7609(6)                                                     | 15.4988(3)                                                     | 15.653(3)                                                        | 44.790(5)                                                                      | 18.9103(9)                                                                     | 14.0550(13)                                                    | 13.8361(4)                                                     |
| α/°                               | 70.117(3)                                                      | 78.3990(10)                                                    | 78.895(13)                                                       | 90                                                                             | 95.174(3)                                                                      | 72.384(4)                                                      | 105.3040(10)                                                   |
| β/°                               | 77.493(3)                                                      | 82.6850(10)                                                    | 82.640(14)                                                       | 93.030(4)                                                                      | 98.141(3)                                                                      | 88.519(5)                                                      | 106.9440(10)                                                   |
| γ/°                               | 78.337(3)                                                      | 76.2090(10)                                                    | 76.679(13)                                                       | 90                                                                             | 101.593(2)                                                                     | 73.552(5)                                                      | 91.7470(10)                                                    |
| V/Å <sup>3</sup>                  | 1431.25(11)                                                    | 1485.31(4)                                                     | 1494.0(5)                                                        | 3276.9(5)                                                                      | 2204.08(19)                                                                    | 1425.1(2)                                                      | 1424.90(7)                                                     |
| Z                                 | 2                                                              | 2                                                              | 2                                                                | 4                                                                              | 2                                                                              | 2                                                              | 2                                                              |
| Dc/g cm <sup>-3</sup>             | 1.329                                                          | 1.321                                                          | 1.318                                                            | 1.394                                                                          | 1.39                                                                           | 1.365                                                          | 1.365                                                          |
| F(000)                            | 604                                                            | 624                                                            | 620                                                              | 1440                                                                           | 956                                                                            | 616                                                            | 616                                                            |
| Reflections collected             | 19699                                                          | 22333                                                          | 25965                                                            | 30549                                                                          | 38733                                                                          | 20166                                                          | 36525                                                          |
| Unique reflections                | 5015                                                           | 4916                                                           | 5274                                                             | 5780                                                                           | 7748                                                                           | 4949                                                           | 9527                                                           |
| Data / restraints / parameters    | 5015 / 0 / 383                                                 | 4916 / 0 / 386                                                 | 5274 / 0 / 382                                                   | 5780 / 0 / 455                                                                 | 7748 / 0 / 562                                                                 | 4949 / 0 / 390                                                 | 9527 / 3 / 779                                                 |
| Goodness-of-fit on F <sup>2</sup> | 0.982                                                          | 1.095                                                          | 1.068                                                            | 0.948                                                                          | 1.063                                                                          | 1.023                                                          | 1.055                                                          |
| R1 (I > 2σ(I))                    | 0.0583                                                         | 0.0593                                                         | 0.0730                                                           | 0.0600                                                                         | 0.053                                                                          | 0.0495                                                         | 0.0504                                                         |
| wR2 (I > 2σ(I))                   | 0.1439                                                         | 0.1847                                                         | 0.2424                                                           | 0.1254                                                                         | 0.1522                                                                         | 0.1296                                                         | 0.1355                                                         |



Table S2. Hydrogen bonds for CIP—NSAIDs molecular salts [Å and deg.].

| CIP—MEF                  | D-H...A               | d(D-H) | d(H...A) | d(D...A) < (DHA) |
|--------------------------|-----------------------|--------|----------|------------------|
|                          | O(2)-H(2)...O(3)      | 0.82   | 1.76     | 2.528(3) 154.3   |
|                          | N(3)-H(3A)...O(5)#1   | 0.89   | 1.85     | 2.710(3) 162.0   |
|                          | N(3)-H(3B)...O(4)     | 0.89   | 1.82     | 2.631(3) 149.8   |
|                          | C(14)-H(14B)...F(1)   | 0.97   | 2.21     | 2.855(4) 123.2   |
|                          | N(4)-H(4)...O(5)      | 0.86   | 1.93     | 2.627(3) 137.6   |
|                          | #1 -x+2,-y,-z+1       |        |          |                  |
| CIP—MEF·H <sub>2</sub> O | C(14)-H(14A)...F(1)   | 0.97   | 2.21     | 2.870(3) 124.3   |
|                          | N(3)-H(3A)...O(4)     | 0.89   | 1.80     | 2.682(2) 171.2   |
|                          | N(3)-H(3A)...O(5)     | 0.89   | 2.60     | 3.172(3) 122.8   |
|                          | N(3)-H(3B)...O(5)#1   | 0.89   | 1.84     | 2.680(2) 156.4   |
|                          | O(2)-H(2)...O(3)      | 0.82   | 1.77     | 2.533(3) 153.8   |
|                          | N(4)-H(4)...O(4)      | 0.86   | 1.93     | 2.608(2) 134.8   |
|                          | #1 -x,-y+1,-z         |        |          |                  |
| CIP—TLF                  | N(4)-H(4)...O(4)      | 0.86   | 1.93     | 2.599(4) 133.6   |
|                          | O(2)-H(2)...O(3)      | 0.82   | 1.81     | 2.523(5) 145.1   |
|                          | N(3)-H(3A)...O(5)#1   | 0.89   | 1.82     | 2.659(4) 156.4   |
|                          | N(3)-H(3B)...O(4)     | 0.89   | 1.81     | 2.690(4) 172.3   |
|                          | N(3)-H(3B)...O(5)     | 0.89   | 2.60     | 3.182(5) 124.0   |
|                          | C(14)-H(14B)...F(1)   | 0.97   | 2.23     | 2.880(6) 123.6   |
|                          | #1 -x,-y,-z+1         |        |          |                  |
| CIP—SLD                  | O(2)-H(2)...O(3)      | 0.82   | 1.75     | 2.506(4) 153.3   |
|                          | N(3)-H(3A)...O(4)#1   | 0.89   | 2.44     | 3.078(4) 129.0   |
|                          | N(3)-H(3A)...O(5)#1   | 0.89   | 1.90     | 2.746(4) 158.9   |
|                          | N(3)-H(3B)...O(4)     | 0.89   | 1.77     | 2.652(4) 169.1   |
|                          | C(14)-H(14B)...F(002) | 0.97   | 2.27     | 2.910(4) 122.4   |
|                          | #1 x,y+1,z            |        |          |                  |





Table S2 (cont.). Hydrogen bonds for CIP—NSAIDs molecular salts [Å and deg.].

|         |                                              |      |      |            |       |
|---------|----------------------------------------------|------|------|------------|-------|
|         |                                              |      |      |            |       |
| CIP—DIC | O(6)-H(6)···O(5)                             | 0.82 | 1.80 | 2.605(3)   | 166.3 |
|         | N(5)-H(5A)···O(7)                            | 0.86 | 2.23 | 3.026(4)   | 154.4 |
|         | O(1)-H(1)···O(3)                             | 0.82 | 1.83 | 2.588(3)   | 152.9 |
|         | N(3)-H(3A)···O(4)                            | 0.89 | 1.85 | 2.723(3)   | 166.2 |
|         | N(3)-H(3B)···O(4)#1                          | 0.89 | 2.40 | 3.094(3)   | 135.5 |
|         | N(3)-H(3B)···O(5)#1                          | 0.89 | 2.01 | 2.876(3)   | 165.1 |
|         | C(14)-H(14A)···F(1)                          | 0.97 | 2.36 | 2.984(4)   | 121.2 |
|         | #1 -x+1,-y+1,-z+1                            |      |      |            |       |
|         |                                              |      |      |            |       |
| CIP—KET | O(1)-H(1)···O(3)                             | 0.82 | 1.75 | 2.5200(19) | 154.8 |
|         | N(3)-H(3A)···O(4)#1                          | 0.89 | 2.39 | 2.949(2)   | 121.4 |
|         | N(3)-H(3A)···O(5)#1                          | 0.89 | 1.88 | 2.769(2)   | 175.4 |
|         | N(3)-H(3B)···O(4)                            | 0.89 | 1.82 | 2.693(2)   | 166.7 |
|         | C(14)-H(14A)···F(1)                          | 0.97 | 2.26 | 2.906(2)   | 123.5 |
|         | #1 -x+1,-y+1,-z                              |      |      |            |       |
|         |                                              |      |      |            |       |
| CIP—DKT | O(2A)-H(2A)···O(3A)                          | 0.82 | 1.77 | 2.526(4)   | 153.0 |
|         | N(3A)-H(3AA)···O(4B)#1                       | 0.89 | 1.82 | 2.681(5)   | 162.0 |
|         | N(3A)-H(3AB)···O(4A)                         | 0.89 | 1.93 | 2.797(5)   | 165.7 |
|         | N(3A)-H(3AB)···O(5A)                         | 0.89 | 2.27 | 2.904(6)   | 128.0 |
|         | C(14A)-H(14B)···F(1A)                        | 0.97 | 2.25 | 2.901(5)   | 123.7 |
|         | O(2B)-H(2B)···O(3B)                          | 0.82 | 1.75 | 2.519(4)   | 154.4 |
|         | N(3B)-H(3BA)···O(4B)#2                       | 0.89 | 2.24 | 2.880(6)   | 128.6 |
|         | N(3B)-H(3BA)···O(5B)#2                       | 0.89 | 2.04 | 2.922(6)   | 168.7 |
|         | N(3B)-H(3BB)···O(5A)#3                       | 0.89 | 1.76 | 2.623(6)   | 162.9 |
|         | C(14B)-H(14C)···F(1B)                        | 0.97 | 2.26 | 2.912(6)   | 123.3 |
|         | #1 x+1,y,z+1    #2 x,y+1,z+1    #3 x-1,y+1,z |      |      |            |       |





Table S3. HPLC method parameters.

| Parameter                        | Details                                                      |
|----------------------------------|--------------------------------------------------------------|
| Column                           | C18 (4.6 mm × 150 mm, 4 µm particle size)<br>Phenomenex      |
| Mobile Phase                     | MilliQ water with 0.1% formic acid-Acetoni-<br>trile (80:20) |
| Flow Rate                        | 0.5 mL/min                                                   |
| Injected Volume                  | 10 µL                                                        |
| Column Temperature               | 25 °C                                                        |
| Sample Temperature               | 25 °C                                                        |
| $\lambda_{\text{max}}$           | 277 nm                                                       |
| Retention Time                   | 4.5 min                                                      |
| Equation                         | $y(x) = 0.0096 \cdot x + 2.6239$                             |
| Regression Coefficient ( $R^2$ ) | 0.9994                                                       |
| Calibration Range                | 2– 232 mg/L (ppm)                                            |

Experimental procedure for determination of solubility by HPLC analysis.

#### *Instrumentation*

A high-performance liquid chromatography (HPLC) with a UV array detection system was used to determine the concentration of CIP. The system was an HPLC Agilent 1200 series and the separation of the target compounds was done using a C18 column (4.6 mm × 150 mm, 4 µm particle size) from Phenomenex, using 0.5 mL/min flow rate and 25°C temperature. UV detection was performed using different wavelengths, one for CIP and another for each NSAID coinciding with their UV maximums of absorbance. At these conditions, the retention time for CIP was 4 min 30 seconds, as can be seen in Figure S1, and from the area under the CIP peak was determined the concentration for the calibration curve. The conditions are summarized in Table S1.

#### *Linearity*

The linearity of the developed chromatographic method was evaluated by injecting (10 µL) CIP in the concentration range of 2– 232 mg/L (ppm). The calibration curve was constructed by plotting the peak area under the CIP peak against concentration (ppm). The calibration curve was fitted to a linear model ( $y(x) = 0.0096 \cdot x + 2.6239$ ) with a correlation coefficient ( $R^2$ ) of 0.9994, using the software MagicPlot 3.0.1, where  $y(x)$  is the CIP concentration and  $x$  is the peak area (Figure S2).



Table S4. Zone of inhibition values of CIP and the reported molecular salts.

| Zone diameter values (mm) |                  |                |
|---------------------------|------------------|----------------|
| 2.5 µg of compound        |                  |                |
| Compounds                 | <i>S. aureus</i> | <i>E. coli</i> |
| CIP                       | 21.12 ± 0.41     | 33.91 ± 0.36   |
| CIP <sub>c</sub> (5 µg)   | 26.89 ± 0.56     | 37.77 ± 0.40   |
| CIP—MEF·H <sub>2</sub> O  | 22.07 ± 0.39     | 33.31 ± 0.49   |
| CIP—MEF                   | 21.20 ± 0.44     | 34.01 ± 0.36   |
| CIP—TLF                   | 19.98 ± 0.62     | 33.82 ± 0.37   |
| CIP—SLD                   | 20.03 ± 0.40     | 31.69 ± 0.60   |
| CIP—DIC                   | 16.34 ± 0.49     | 32.05 ± 0.53   |
| CIP—KET                   | 22.12 ± 0.53     | 35.19 ± 0.55   |
| CIP—DKT                   | 18.03 ± 0.42     | 32.72 ± 0.47   |



Table S5. Contribution of CIP in each CIP–NSAID molecular salt.

|                          | Molecular weight | % CIP in the salt | $\mu\text{g}$ of CIP in the experiment (2.5 $\mu\text{g}$ total) |
|--------------------------|------------------|-------------------|------------------------------------------------------------------|
| CIP—DKT                  | 585.6            | 0.57              | 1.41                                                             |
| CIP—KET                  | 585.6            | 0.57              | 1.41                                                             |
| CIP—MEF                  | 572.6            | 0.58              | 1.45                                                             |
| CIP—MEF·H <sub>2</sub> O | 590.6            | 0.56              | 1.40                                                             |
| CIP—SLD                  | 687.8            | 0.47              | 1.17                                                             |
| CIP—TLF                  | 593.1            | 0.56              | 1.40                                                             |
| CIP—DIC                  | 923.6            | 0.36              | 0.90                                                             |
| CIP                      | 331.3            |                   | 2.5                                                              |



Table S6. Final pH values measured during solubility determination by HPLC analysis.

|         | at pH 1.2 | at pH 6.8 |
|---------|-----------|-----------|
| CIP—DKT | 1.84      | 5.90      |
| CIP—KET | 1.71      | 6.26      |
| CIP—MEF | 2.19      | 6.98      |
| CIP—TLF | 1.51      | 6.96      |
| CIP—DIC | 1.54      | 6.80      |
| CIP     | 4.75      | 4.65      |
